# Supplementary material for: De novo biosynthesis of 4,6-dihydroxycoumarin in Escherichia coli
Source: Royal Society of Chemistry journal article supplement (doi:10.1039/d4gc05694a), 2025-01-01
Supplement: d4gc05694a1.pdf [file d4gc05694a1.pdf]

## Supplementary Information

### **De novo biosynthesis of the 4,6-dihydroxycoumarin in *Escherichia coli***

Qi Gan<sup>δ1</sup>, Tian Jiang<sup>δ1</sup>, Chenyi Li<sup>1</sup>, Xinyu Gong<sup>1</sup>, Jianli Zhang<sup>1</sup>, Bhaven Kalpesh Desai<sup>1</sup>, Yajun Yan<sup>1\*</sup>

<sup>1</sup> School of Chemical, Materials, and Biomedical Engineering, College of Engineering, The University of Georgia, Athens, GA, 30602, USA

\*Correspondence: [yajunyan@uga.edu](mailto:yajunyan@uga.edu)

<sup>δ</sup>These authors contributed equally to this work.

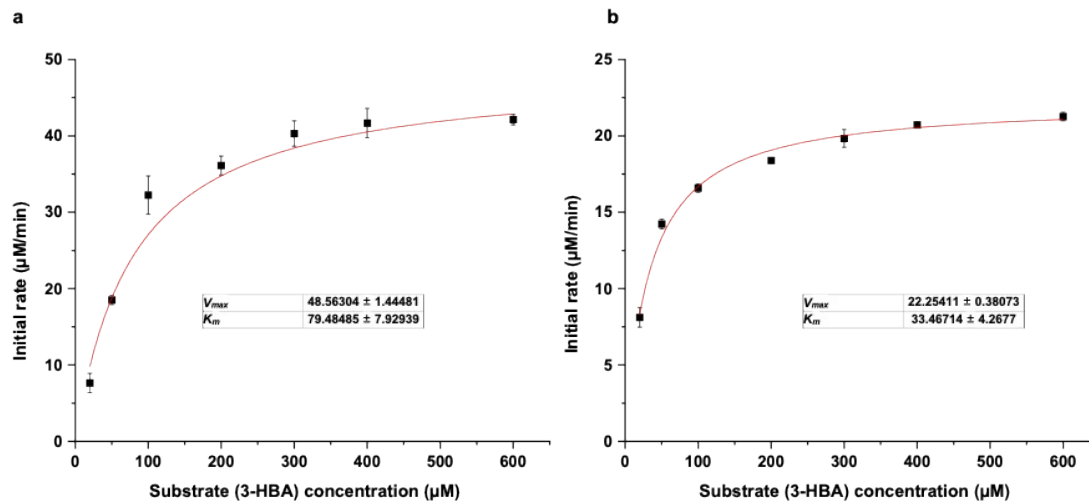

**Supplementary Fig. 1 Kinetic parameters of (a) 3HB6H and (b) Re3HB6H towards 3-HBA.** The  $K_m$  and  $V_{max}$  values were estimated with OriginPro2020 through non-linear regression of the Michaelis-Menten equation. Protein concentration  $[E]$  in the reaction systems is  $0.25 \mu\text{M}$  for 3HB6H and  $0.65 \mu\text{M}$  for Re3HB6H. The turnover number ( $k_{cat}$ ) values were subsequently calculated using the formula  $k_{cat} = V_{max} / [E]$ . The data presented represents the mean  $\pm$  standard deviation (SD) from three independent experiments, with error bars indicating the SD.

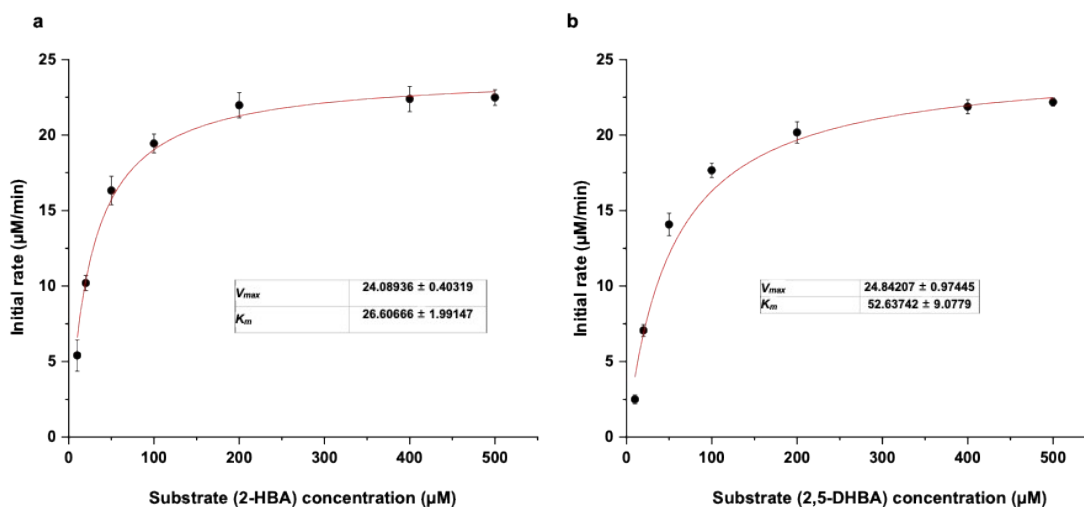

**Supplementary Fig. 2 The kinetic parameters of sdgA towards (a) 2-HBA and (b) 2,5-DHBA were determined.** The Michaelis-Menten equation was fitted to experimental data using OriginPro2020 to estimate the  $K_m$  and  $V_{max}$  values. The protein concentration  $[E]$  in the reaction systems was  $0.03 \mu\text{M}$ . The turnover number ( $k_{cat}$ ) values were

subsequently calculated using the formula  $k_{cat} = V_{max} / [E]$ . The data presented represents the mean  $\pm$  standard deviation (SD) from three independent experiments, with error bars indicating the SD.

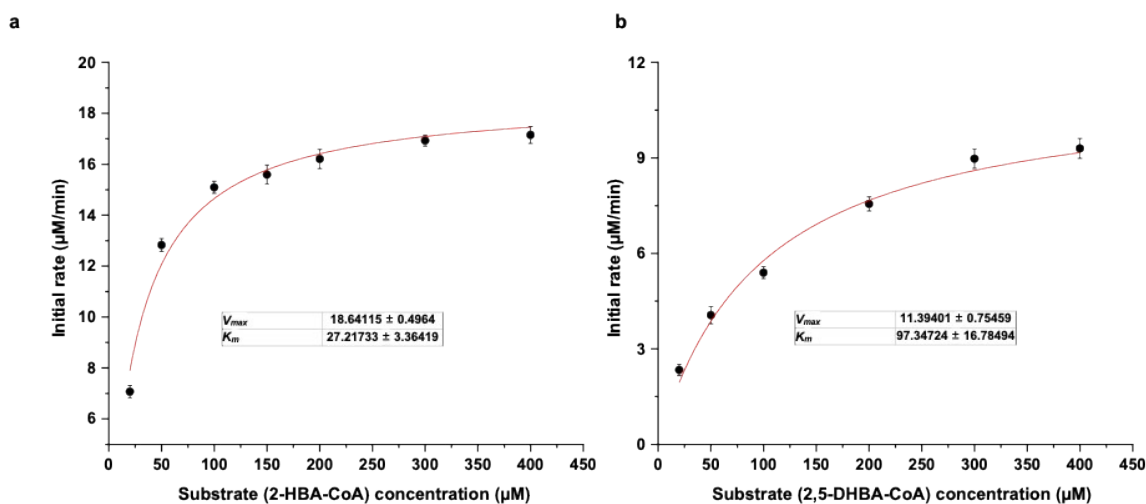

**Supplementary Fig. 3 Activity of PqsD towards (a) 2-HBA-CoA and (b) 2,5-DHBA-CoA.** The Michaelis-Menten equation was fitted to experimental data using OriginPro2020 to estimate the  $K_m$  and  $V_{max}$  values. The protein concentration  $[E]$  in the reaction systems was  $0.18 \mu\text{M}$ . The turnover number ( $k_{cat}$ ) values were subsequently calculated using the formula  $k_{cat} = V_{max} / [E]$ . The data presented represents the mean  $\pm$  standard deviation (SD) from three independent experiments, with error bars indicating the SD.

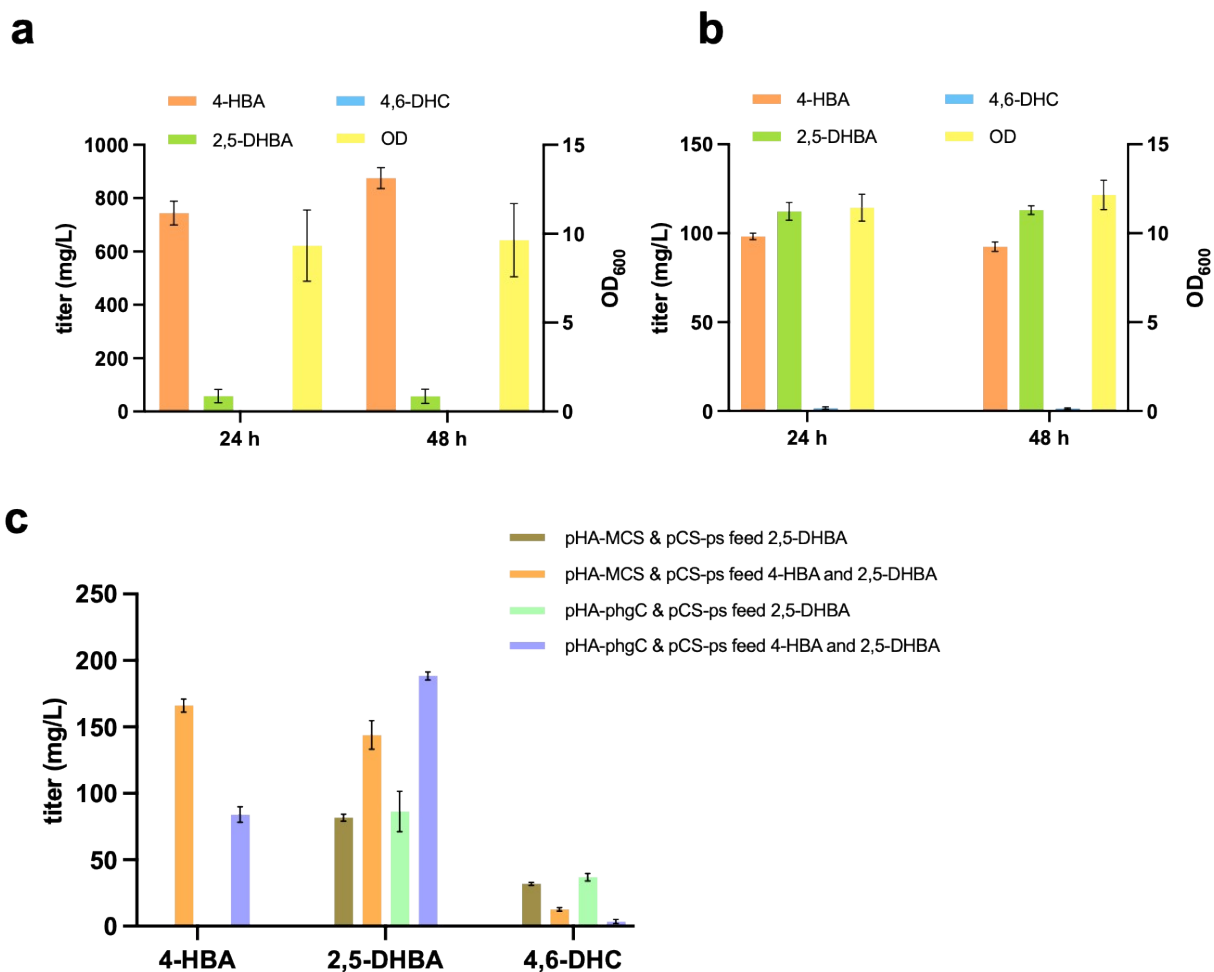

**Supplementary Fig. 4 The conversion from 2,5-DHBA-CoA to 4,6-DHC through the route III (4-HBA pathway).**

**a.** The titer of Strain DX7 (BW25113 (F')) co-expressing plasmids pCS-PS and pHA-PhgA-PhgB-PhgC) by feeding 1g/L 4-HBA. **b.** The titer of strain DX7S (BW25113 (F')) expressing plasmids pHA-PhgC-PhgA-PqsD) by feeding 200 mg/L 4-HBA. **c.** The titer of 4-HBA, 2,5-DHBA and 4,6-DHC of different strains in the feeding experiment. *E. coli* BW25113 (F') expressing different plasmids were tested, to investigate the influence of 4-HBA-CoA on the conversion of 2,5-DHBA-CoA to 4,6-DHC. The data presented represents the mean±standard deviation (SD) from three independent experiments, with error bars indicating the SD.

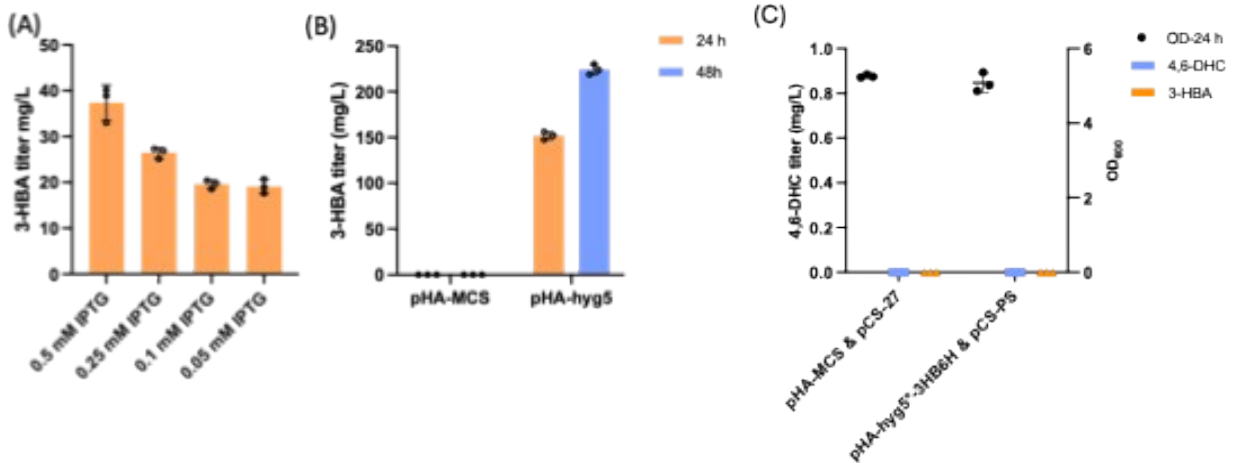

**Supplementary Fig. 5 Strategies applied to improve 3-HBA production.** (A) 3-HBA titer induced by different IPTG concentration. (B) 3-HBA titer after introducing pHA-Hyg5 into the strain *E. coli* ATCC 31884  $\Delta pheA \Delta tyrA$ , (C) the titer of 4,6-DHC and 3-HBA and the OD<sub>600</sub> after introducing different plasmids into the strain *E. coli* ATCC 31884  $\Delta pheA \Delta tyrA$ . The data presented represents the mean  $\pm$  standard deviation (SD) from three independent experiments, with error bars indicating the SD.

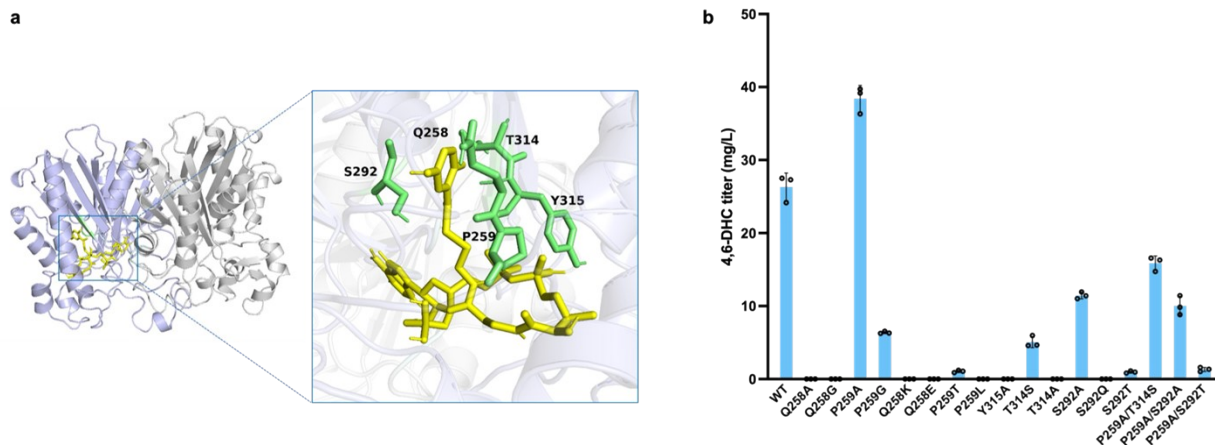

**Supplementary Fig. 6 Protein engineering of PqsD to enhance 4,6-DHC production.** **a.** Binding model illustrating the interaction of 2,5-DHBA-CoA with PqsD. The model was constructed using PqsD from *Pseudomonas aeruginosa* PAO1 as a template, with potential five target residues for enzyme engineering highlighted in green. **b.** Concentrations of 4,6-DHC produced in flask cultures of the DX1 strain (*E. coli* BW25113 (F')) carrying pCS-PqsD-SdgA) and its derivative strains (*E. coli* BW25113 (F')) carrying pCS-PqsD\*-SdgA), each containing one of the 17 different PqsD mutants. The data presented represents the mean  $\pm$  standard deviation (SD) from three independent experiments, with error bars indicating the SD.

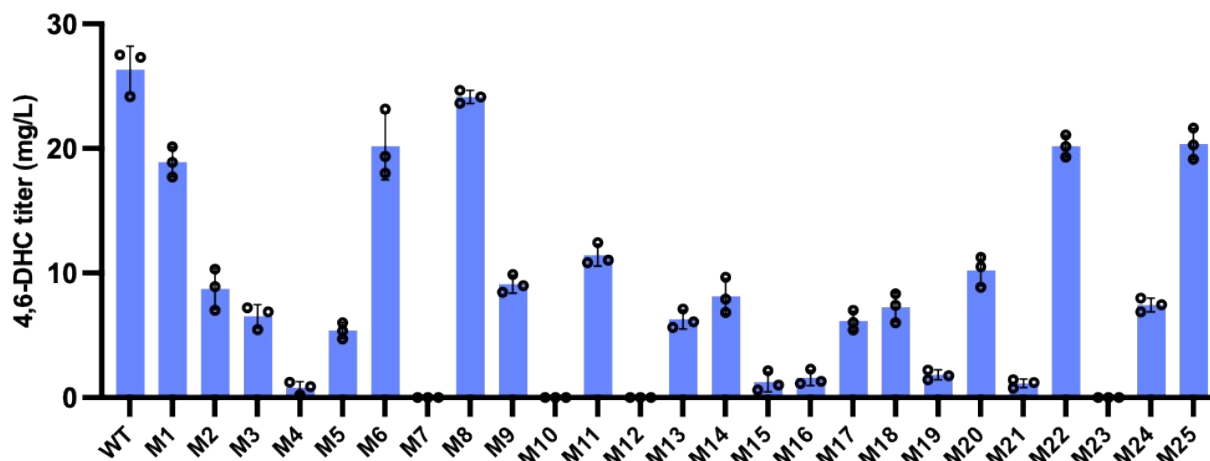

**Supplementary Fig. 7** Enzyme screening for the random mutagenized variants based on pqsD(P259M<sub>x</sub>)-sdgA. Concentrations of 4,6-DHC produced in flask cultures of the strain *E. coli* BW25113 (F<sup>+</sup>) carrying pCS-PqsD(M<sub>x</sub>)-SdgA. Note: WT (Wide Type): Refers to the wild-type (unmodified) version of the pqsD enzyme. M<sub>x</sub> (Variants): Represents the specific variants of pqsD with mutations at the P259 site. The data presented represents the mean ± standard deviation (SD) from three independent experiments, with error bars indicating the SD.

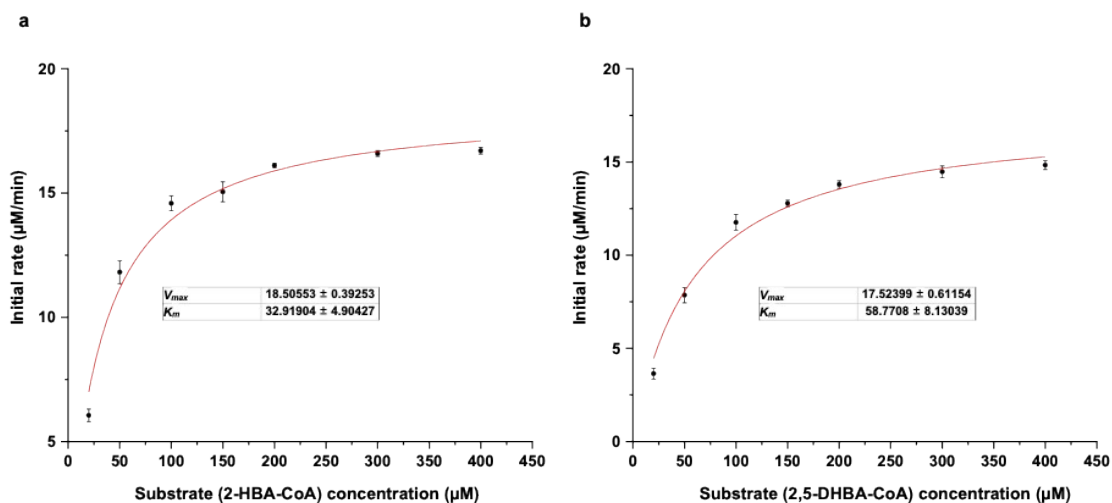

**Supplementary Fig. 8** Kinetic parameters of PqsD-P259A towards (a) 2-HBA-CoA and (b) 2,5-DHBA-CoA. The  $K_m$  and  $V_{max}$  values were estimated with OriginPro2020 through non-linear regression of the Michaelis-Menten equation. Protein concentration [E] in the reaction systems is 0.12  $\mu\text{M}$ . The turnover number ( $k_{cat}$ ) values were subsequently calculated using the formula  $k_{cat} = V_{max} / [E]$ . The data presented represents the mean ± standard deviation (SD) from three independent experiments, with error bars indicating the SD.

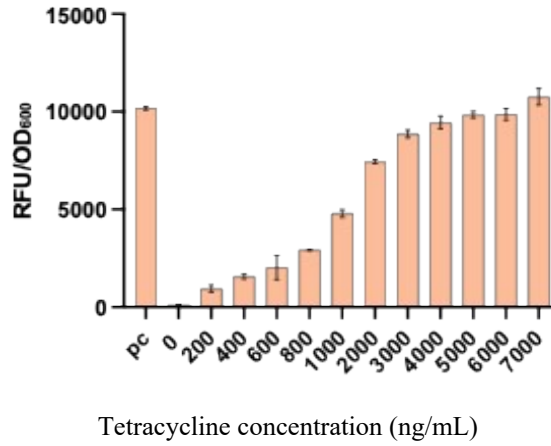

**Supplementary Fig. 9** Tetracycline Inducible concentration test. This test was carried out using strain P1, BW25113/F' carrying pZE-EP-P<sub>teto1</sub>-egfp and pCS-SalABCD-P<sub>lpp0.2</sub>-tetR, the positive control was tested using BW25113/F' carrying pZE-EP-P<sub>laco1</sub>-egfp and pCS-SalABCD-P<sub>lpp0.2</sub>-tetR.

(A) 4-HC

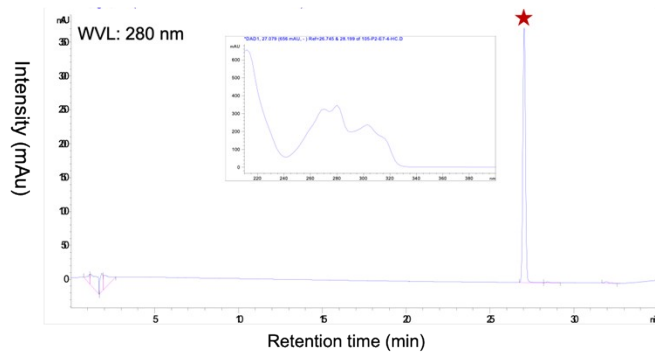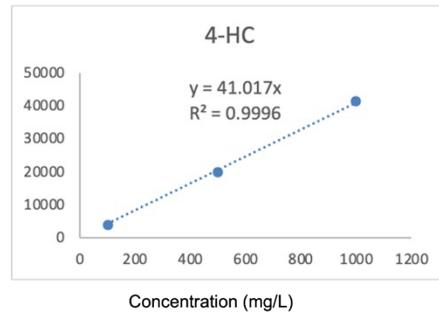

(B) 4,6-DHC

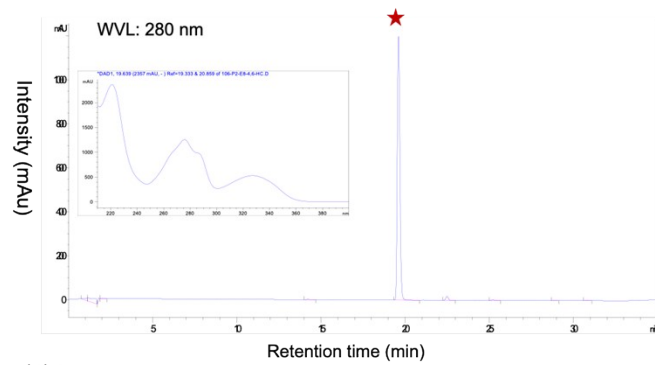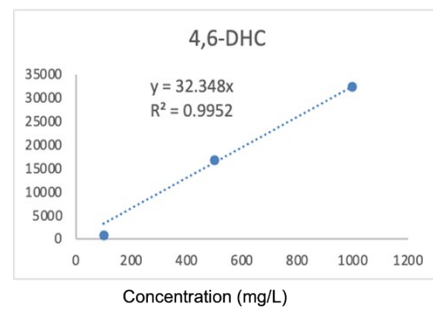

(C) 2,5-DHBA

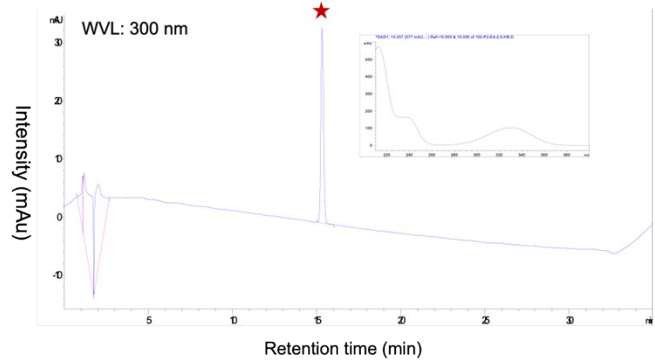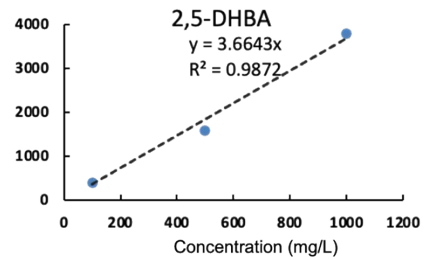

**Supplementary Fig. 10 HPLC analysis of critical products in this research.** (A) the 4-HC standard and its standard curve. (B) the 4,6-DHC standard and its standard curve. (C) the 2,5-DHBA standard and its standard curve. UV absorbance profiles are shown beside the peaks.



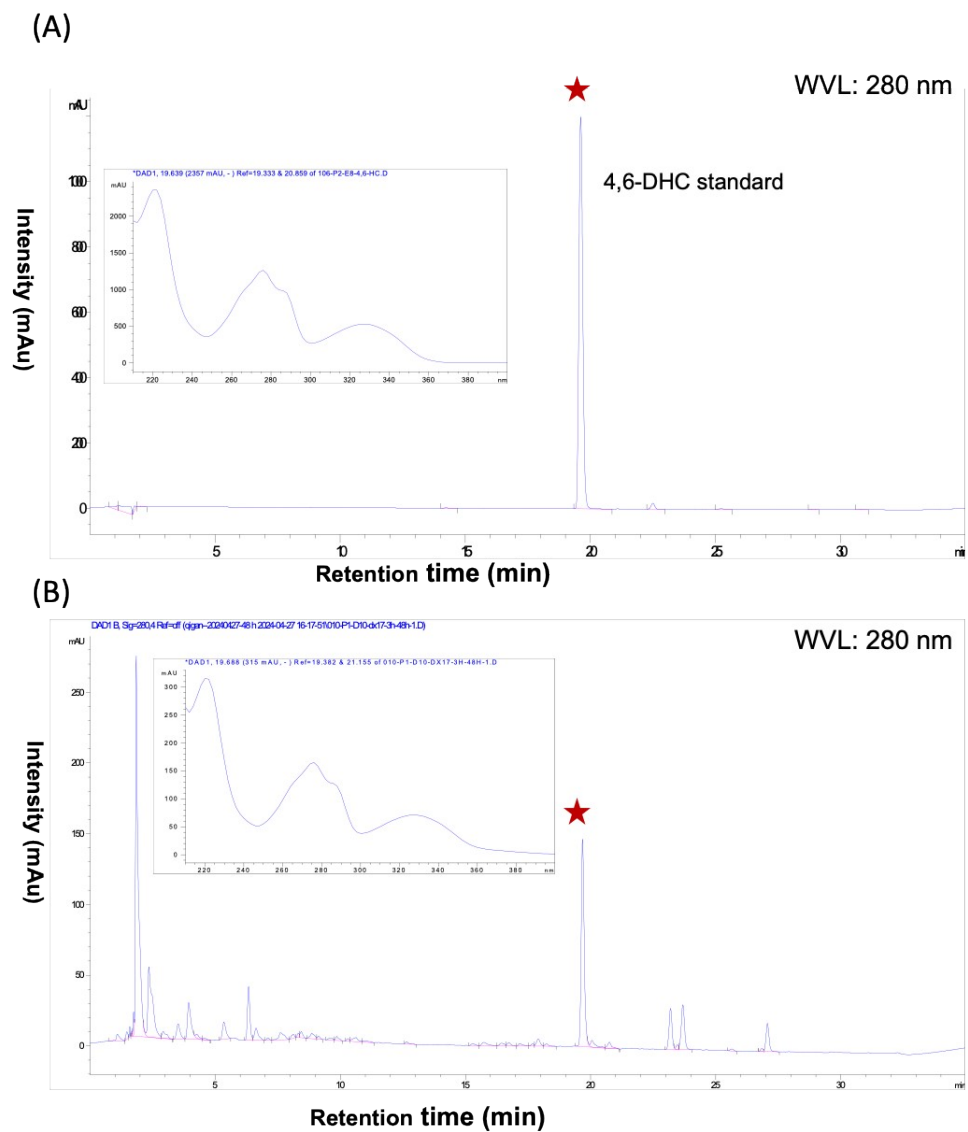

**Supplementary Fig. 11 HPLC analysis of 4,6-DHC produced by strain DX17.** (A) A sample taken from the cell culture after 48 hours. (B) 100 mg/L 4,6-DHC standard. The retention time of 4,6-DHC was about 19.4 min. UV absorbance profiles are shown beside the peaks.

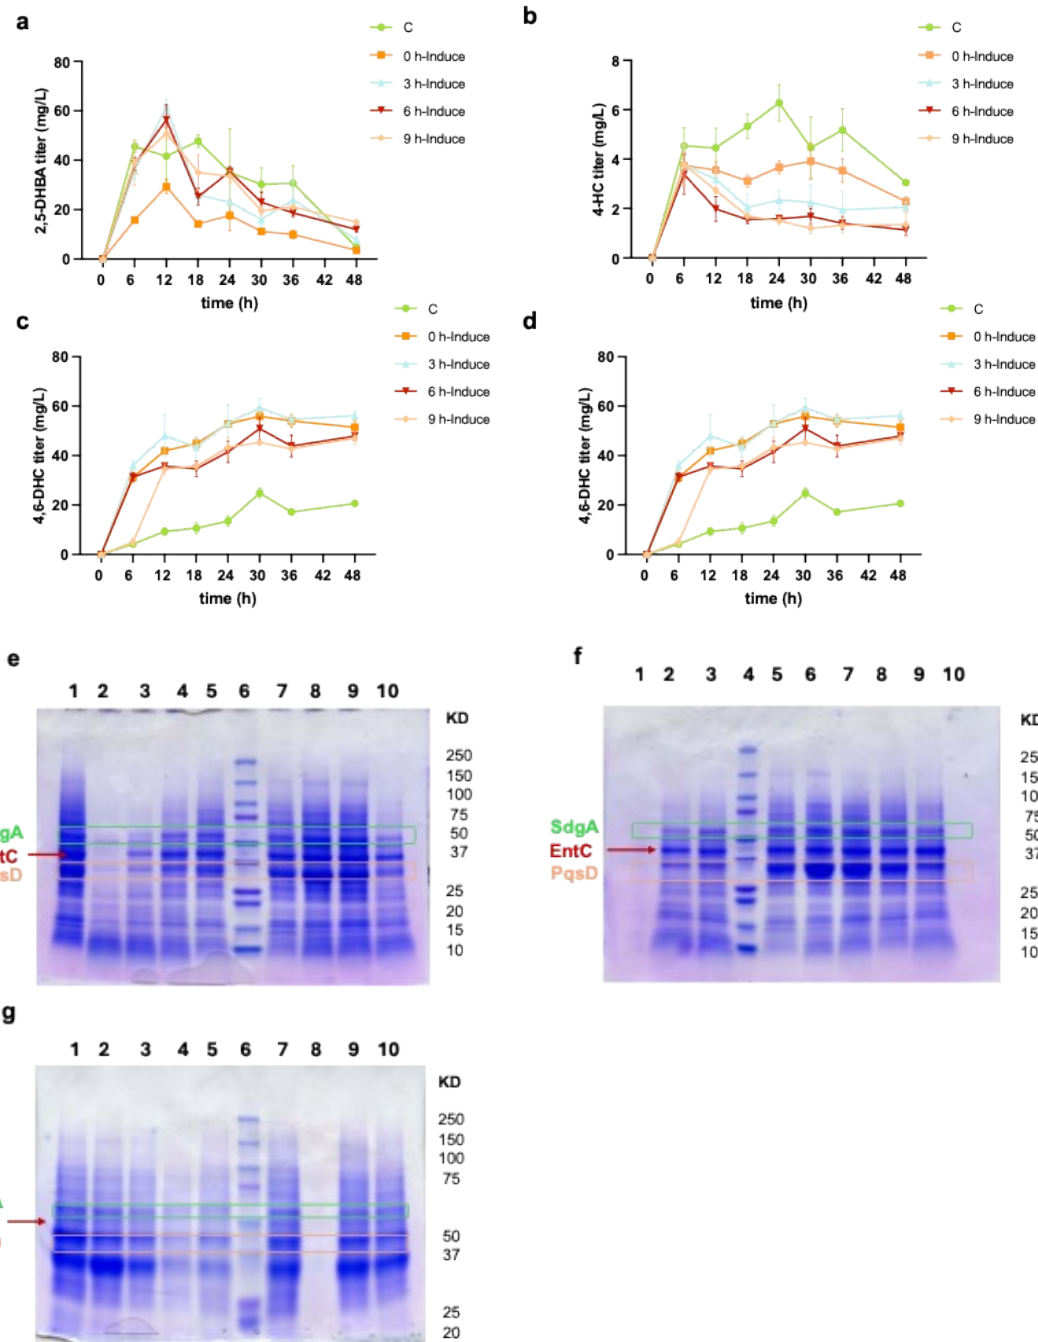

**Supplementary Fig. 12 Inducible regulation of de novo biosynthesis of 4,6-DHC in strain DX17.** **a.** The titer of 2,5-DHBA by using different induction time. **b.** The titer of 4-HC by using different induction time. **c.** The titer of 4,6-DHC by using different induction time. **d.** The  $OD_{600}$  by using different induction time. **e.** SDS-PAGE analysis was performed to assess protein expression levels. The bands corresponding to specific enzymes are highlighted in different colors and marked with distinct arrows. 1: c-6h, 2: 0h-6h, 3: 3h-6h, 4: 6h-6 h, 5: 9h-6h, 6: marker, 7: c-12 h, 8: 0h-12 h, 9:3 h-12 h, 10:6 h-12 h. **f.** SDS-PAGE analysis was performed to assess protein expression levels. The bands corresponding to specific enzymes are highlighted in different colors and marked with distinct arrows. 2: 6h-12h, 3: 9h-12h, 4: marker, 5: c-18 h, 6: 0h-18 h, 7:3 h-18 h, 8:6 h-18h, 9:9 h-18h. **g.** SDS-PAGE analysis was performed to assess protein expression levels. The bands corresponding to specific enzymes are highlighted in different colors and marked with distinct arrows. 1: c-24 h, 2: 0h-24 h, 3: 3h-24 h, 4: 6h-24 h, 5: 9h-24 h, 6: marker, 7: c-30 h, 8: 0h-30 h, 9:3 h-30 h, 10:6 h-30 h. (Note:  $X_1$  h- $X_2$  h indicates detection at  $X_2$ h, where tetracycline was added at  $X_1$ h after IPTG)

induction. "c" refers to the control group, which genes *sdgA* and *pqsD* are under *PlacO1* promoter) The data presented represents the mean  $\pm$  standard deviation (SD) from three independent experiments, with error bars indicating the SD. The SDS-PAGE analysis was performed using samples from triplicate cultures.

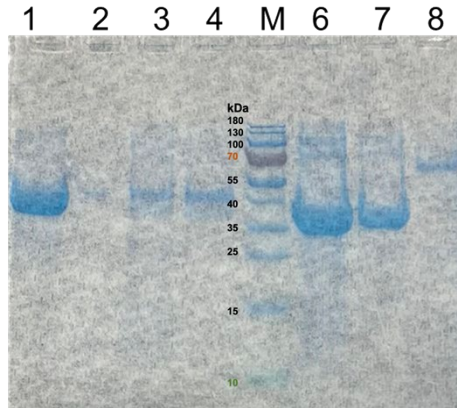

**Supplementary Fig. 13 SDS-PAGE analysis of purified proteins.** 1: 3HB6H, 2: Re3HB6H, 3: Hyg5, 4: Hyg5\*, 5: Marker, 6: PqsD, 7: PqsD –P259A, 8: SdgA.

**Table S1. Strains and plasmids used in this study**

| Strains                        | Description                                                                                                | Reference  |
|--------------------------------|------------------------------------------------------------------------------------------------------------|------------|
| <i>E. coli</i> BW25113/F'      | <i>rrnBT14 ΔlacZWJ16 hsdR514 ΔaraBADAH33 ΔrhaBADLD78</i><br><i>F' [traD36 proAB lacIqZAM15 Tn10(Tetr)]</i> | 1          |
| <i>E. coli</i> XL1-blue        | <i>recA1 endA1gyrA96thi-1hsdR17supE44relA1lac [F' proAB</i><br><i>lacIqZDM15Tn10 (TetR)]</i>               | Stratagene |
| <i>E. coli</i> BL21 Star (DE3) | <i>F-OMPT HSDSB (RB-MB-) GAL DCM (DE3)</i>                                                                 | Invitrogen |
| <i>E. coli</i> ATCC 31884      | <i>E. coli</i> ATCC31884 <i>ΔpheLA ΔtyrA</i>                                                               | 2          |
| <i>ApheA Δtyr</i>              |                                                                                                            |            |
| DX1                            | BW25113/F' carrying pCS-PS                                                                                 | This study |
| DX2                            | BW25113/F' carrying pZE-SalABCD                                                                            | This study |
| DX3                            | BW25113/F' carrying pHA-3HB6H                                                                              | This study |
| DX4                            | BW25113/F' carrying pHA-PhgC-PhgB-PhgA                                                                     | This study |
| DX5                            | BW25113/F' carrying pZE-SalABCD and pCS-PS                                                                 | This study |
| DX5'                           | BW25113/F' carrying pZE-P <sub>lpp0.2</sub> -tetR-SalABCD and pCS-<br>P <sub>tetO1</sub> -PqsD-SdgA        | This study |
| DX6                            | BW25113/F' carrying pHA-3HB6H and pCS-PS                                                                   | This study |
| DX7                            | BW25113/F' carrying pHA-PhgC-PhgB-PhgA and pCS-PS                                                          | This study |
| DX7S                           | BW25113/F' carrying pHA-PhgC-PhgA-PqsD                                                                     | This study |
| DX8                            | BW25113/F' carrying pZE-EP                                                                                 | This study |

| DX9                | BW25113/F' carrying pHA-Hyg5                                                                                                                                                  | This study |
|--------------------|-------------------------------------------------------------------------------------------------------------------------------------------------------------------------------|------------|
| DX10               | BW25113/F' carrying pHA-Hyg5*                                                                                                                                                 | This study |
| DX11               | BW25113/F' carrying pHA-Ubic                                                                                                                                                  | This study |
| DX12               | BW25113/F' carrying pZE-EPPS and pCS-SalABCD                                                                                                                                  | This study |
| DX13               | BW25113/F' carrying pHA-Hyg5-3HB6H and pCS-PS                                                                                                                                 | This study |
| DX14               | BW25113/F' carrying pHA-PhgC-PhgB-PhgA and pCS-PS-Ubic                                                                                                                        | This study |
| DX15               | BW25113/F' carrying pHA-Hyg5*-3HB6H and pCS-PS                                                                                                                                | This study |
| DX16               | BW25113/F' carrying pZE-EP-P <sub>tetO1</sub> -PqsD-SdgA and pCS-SalABCD-P <sub>lpp0.2</sub> -tetR                                                                            | This study |
| DX17               | BW25113/F' carrying pZE-EP-P <sub>tetO1</sub> -PqsD (P259A)-SdgA and pCS-SalABCD-P <sub>lpp0.2</sub> -tetR                                                                    | This study |
| P1                 | BW25113/F' carrying pZE-EP-P <sub>tetO1</sub> -egfp and pCS-SalABCD-P <sub>lpp0.2</sub> -tetR                                                                                 | This study |
| Plasmids           | Description                                                                                                                                                                   | Reference  |
| pZE12-luc          | P <sub>LlacO1</sub> ; <i>luc</i> ; <i>ColE1 ori</i> ; <i>Amp<sup>R</sup></i>                                                                                                  | 3          |
| pCS27              | P <sub>LlacO1</sub> ; <i>p15A ori</i> ; <i>Kan<sup>R</sup></i>                                                                                                                | 4          |
| pMK-eGFP-MCS       | P <sub>LlacO1</sub> ; eGFP; multiple cloning site; <i>p15A ori</i> ; <i>Kan<sup>R</sup></i>                                                                                   | 5          |
| pHA-eGFP-MCS       | P <sub>LlacO1</sub> ; eGFP; multiple cloning site; <i>ColE1 ori</i> ; <i>Amp<sup>R</sup></i>                                                                                  | 6          |
| pHA-MCS            | P <sub>LlacO1</sub> ; multiple cloning site; <i>ColE1 ori</i> ; <i>Amp<sup>R</sup></i>                                                                                        | 6          |
| pMK-MCS            | P <sub>LlacO1</sub> ; multiple cloning site; <i>p15A ori</i> ; <i>Kan<sup>R</sup></i>                                                                                         | 5          |
| pETDuet-1          | two T7 promoters; two MCS; <i>pBR322 ori</i> ; <i>Amp<sup>R</sup></i>                                                                                                         | Novagen    |
| pCS-PS             | pCS-27 containing <i>pqsD-sdgA</i> under the promoter P <sub>LlacO1</sub> in one operon                                                                                       | 7          |
| pZE-SalABCD        | pZE12-luc containing <i>salAB</i> , <i>salCD</i> from <i>Ralstonia eutropha</i>                                                                                               | 8          |
| pHA-3HB6H          | pHA-MCS containing <i>3hb6h</i> from <i>Rhodococcus jostii</i> RHA1 under the control of promoter P <sub>LlacO1</sub>                                                         | This study |
| pHA-PhgC-PhgB-PhgA | pHA-MCS containing <i>phgC</i> , <i>phgB</i> , <i>phgA</i> from <i>Brevibacillus laterosporus</i> PHB-7a under the control of promoter P <sub>LlacO1</sub> in separate operon | This study |
| pZE-EP             | pZE12-luc containing <i>entC-pfpchB</i>                                                                                                                                       | 7          |
| pHA-Hyg5           | pHA-MCS containing <i>hyg5</i> from <i>Streptomyces</i>                                                                                                                       | This study |

|                                              |                                                                                                                                                            |            |
|----------------------------------------------|------------------------------------------------------------------------------------------------------------------------------------------------------------|------------|
|                                              | <i>rapamycinicus</i> under the control of promoter P <sub>LacO1</sub>                                                                                      |            |
| pHA-Hyg5*                                    | pHA-MCS containing <i>hyg5</i> * under the control of promoter P <sub>LacO1</sub>                                                                          | This study |
| pHA-Ubic                                     | pHA-MCS containing <i>ubic</i> from <i>Escherichia coli</i> MG1655 under the control of promoter P <sub>LacO1</sub>                                        | This study |
| pZE-EPPS                                     | pZE12-luc containing <i>entC-pfpchB-pqsD-sdgA</i>                                                                                                          | 7          |
| pCS-SalABCD                                  | pCS-27 containing <i>salABCD</i>                                                                                                                           | This study |
| pHA-Hyg5-3HB6H                               | pHA-MCS containing <i>hyg5</i> and <i>3hb6h</i> under the control of promoter P <sub>LacO1</sub> in separate operon                                        | This study |
| pHA-Hyg5*-3HB6H                              | pHA-MCS containing <i>hyg5</i> * and <i>3hb6h</i> under the control of promoter P <sub>LacO1</sub> in separate operon                                      | This study |
| pCS-PS-Ubic                                  | pCS-27 containing <i>pqsD-sdgA</i> and <i>ubic</i> under the promoter P <sub>LacO1</sub> in separate operon                                                | This study |
| pMK-Ubic                                     | pMK-MCS containing <i>ubic</i>                                                                                                                             | This study |
| pHA-PhgC-PhgA-PqsD                           | pHA-MCS containing <i>phgA</i> , <i>phgC</i> and <i>pqsD</i> under the promoter P <sub>LacO1</sub> in separate operon                                      | This study |
| pZE-P <sub>tetO1</sub> -PqsD-SdgA            | pZE12-luc containing <i>pqsD-sdgA</i> under the control of promoter P <sub>tetO1</sub> , respectively                                                      | This study |
| pZE-EP-P <sub>tetO1</sub> -PqsD-SdgA         | pZE12-luc containing <i>entC-pfpchB</i> and <i>pqsD-sdgA</i> under the control of promoter P <sub>LacO1</sub> and P <sub>tetO1</sub> , respectively        | This study |
| pZE-EP-P <sub>tetO1</sub> -PqsD (P259A)-SdgA | pZE12-luc containing <i>entC-pfpchB</i> and <i>pqsD(P259A)-sdgA</i> under the control of promoter P <sub>LacO1</sub> and P <sub>tetO1</sub> , respectively | This study |
| <b>pCS-PqsD(M<sub>x</sub>)-sdgA</b>          | pCS-27 containing <i>pqsD(M<sub>x</sub>)-sdgA</i> under the promoter P <sub>LacO1</sub> in one operon                                                      | This study |
| pZE-PtetO1- eGFP                             | pZE12-luc, tetO1; eGFP                                                                                                                                     | This study |
| pCS-lpp0.2-RBS1.0-K127Y                      | pCS27 carrying the promoter P <sub>lpp0.2</sub> , RBS1.0, and regulator K127Y                                                                              | 5          |
| pCS-P <sub>lpp0.2</sub> -tetR                | pCS27 carrying the promoter P <sub>lpp0.2</sub> and regulator tetR                                                                                         | This study |
| pCS-P <sub>lpp0.2</sub> -tetR-SalABCD        | pCS-27 containing <i>salABCD</i> and <i>tetR</i> under the control of promoter of P <sub>LacO1</sub> and P <sub>lpp0.2</sub> , respectively                | This study |
| pZE-EP-P <sub>laco1</sub> -egfp              | pZE12-luc containing <i>entC-pfpchB</i> and <i>egfp</i> under the control of promoter P <sub>LacO1</sub>                                                   | This study |
| pZE-EP-P <sub>tetO1</sub> -egfp              | pZE12-luc containing <i>entC-pfpchB</i> and <i>egfp</i> under the                                                                                          | This study |

| control of promoter P <sub>LacO1</sub> and P <sub>tetO1</sub> , respectively |                                          |            |
|------------------------------------------------------------------------------|------------------------------------------|------------|
| pET-SdgA                                                                     | pETDuet-1 containing <i>sdgA</i>         | This study |
| pET-3HB6H                                                                    | pETDuet-1 containing <i>3hb6h</i>        | This study |
| pET-Re3HB6H                                                                  | pETDuet-1 containing <i>Re3hb6h</i>      | This study |
| pET-PqsD                                                                     | pETDuet-1 containing <i>pqsD</i>         | This study |
| pET-PqsD (P259A)                                                             | pETDuet-1 containing <i>pqsD</i> (P259A) | This study |
| pET-Hyg5                                                                     | pETDuet-1 containing <i>hyg5</i>         | This study |
| pET-Hyg5*                                                                    | pETDuet-1 containing <i>hyg5*</i>        | This study |

**Table S2 DNA sequences used in this study**

| Name                         | Sequence (5'-3')                                                                                                                                                                                                                                                                                                                                                                                                                                                                                                                                                                                                                                                                                                                                                                                                                                                                                                                                                                                                                     |
|------------------------------|--------------------------------------------------------------------------------------------------------------------------------------------------------------------------------------------------------------------------------------------------------------------------------------------------------------------------------------------------------------------------------------------------------------------------------------------------------------------------------------------------------------------------------------------------------------------------------------------------------------------------------------------------------------------------------------------------------------------------------------------------------------------------------------------------------------------------------------------------------------------------------------------------------------------------------------------------------------------------------------------------------------------------------------|
| P <sub>LacO1</sub> promoter  | AATTGTGAGCGGATAACAATTGACATTGTGAGCGGATAACAAGATACTGAGCACATCAGCAGG<br>ACGCACTGACC                                                                                                                                                                                                                                                                                                                                                                                                                                                                                                                                                                                                                                                                                                                                                                                                                                                                                                                                                       |
| P <sub>tetO1</sub> promoter  | TCCCTATCAGTGATAGAGATTGACATCCCTATCAGTGATAGAGATACTGAGCACATCAGCAGG<br>ACGCACTGACC                                                                                                                                                                                                                                                                                                                                                                                                                                                                                                                                                                                                                                                                                                                                                                                                                                                                                                                                                       |
| P <sub>lpp0.2</sub> promoter | ATCAAAAAATATTGACAACATAAAAACTTTGTGTTGCTGGTGTAACG                                                                                                                                                                                                                                                                                                                                                                                                                                                                                                                                                                                                                                                                                                                                                                                                                                                                                                                                                                                      |
| <i>3hb6h</i>                 | ATGTCGAACCTGCAGGACGCACGTATCATTATTGCCGGAGGAGGAATCGGAGGCGCGGCCAA<br>TGCCTTGGCCCTGGCGCAGAAAAGGTGCAAATGTAACGTTATTGAAACGCGCCTCTGAGTTCGG<br>CGAAGTAGGTGCCGACTTCAAGTCGGACCACATGGAGCGCGTATCCTGGATTCCTGGGGAG<br>TCCTGGATGACGTGTTATCACGCGCCTTCTGCCAAAAACATCGTCTTTCGTGACGCCATTAC<br>TGCGGAAGTTTGTACGAAGATCGATCTGGGGTCGGAATTCGCGGACGTTATGGCGGACCATA<br>TTTTGTTACTCATCGTAGCGACCTGCACGCCACCTTAGTGGATGCAGCGCGCGCTGCTGGAGC<br>CGAATTACATACCGGGGTTACCGTTACCGATGTCATCACGGAGGGCGACAAAGCAATCGTCAG<br>CACTGATGATGGGCGCACCCACGAGGCTGATATCGCTCTTGGCATGGACGGTCTTAAGTCCCG<br>TTACGCGAAAAGATCTCGGGAGATGAACCTGTGAGCAGCGGATATGCTGCGTACCGCGGCA<br>CAACGCCGTACCGTGATGTAGAACTGGATGAGGATATCGAGGATGTTGTAGGTTACATCGGCC<br>CGCGTTGTCACTTCATCCAGTACCCACTGCGCGGGGAGAGATGCTTAATCAAGTTGCCGTCT<br>TTGAATCACCGGGCTTCAAGAATGGCATCGAAAACCTGGGGAGGACCGGAAGAATTAGAACAG<br>GCATACGCACACTGCCACGAAAACGTGCGTTCGCGGTATCGATTATTTGTGGAAGGATCGTTGG<br>TGGCCTATGTACGACCGGAACCAATCGAAAATTTGGGTTCGACGGTTCGTATGATTCTTTTGGGC<br>GATGCTGCTCACCTCCACTGCAATATTTGGCGTCTGGGGCGGTTATGGCTATTGAGGACGCA |

AAATGCCTGGCCGACTATGCGGCAGAGGACTTTAGCACCGGTGGAAACAGCGCCTGGCCGCA  
GATTCTTAAGGAAGTAAACACAGAGCGCGCTCCGCGCTGCAATCGCATCTTAACGACCGGCCG  
CATGTGGGGAGAGTTGTGGCACCTTGACGGGACGGCCCGTATTGCACGCAACGAACTTTTTTCG  
TACTCGTGATACCAGTTCCTATAAATACACCGATTGGCTGTGGGGATATAGTTCGGACCGCGC  
TTCGTAA

*Re3hb6h*

ATGAGCAGTACCAACAACGCGACCGGAAGGTCTCATCATCGGGCGGCGGCATCGGGCGCCT  
CGCCGCTGCGCTGGCGCTCGCACGCCAGGGCATCCGCATCGAACTGCTGGAACAGGCCGAGC  
AGATCGGGGAGATCGGGCGGGGCATCCAGCTGGCCGCAACGCCTTTGCCGCACTGGATGCG  
CTGGGGCTAGGGCAAGCTGCGCGCAGCCGGGCTGTCTTTACCGACTACCTCAGCCTGCGCGA  
TGCGATCGATACCAGCGTGATCGCCGAGGTTGACGTTGGGCAGGCGTATCGTGAACGCTTCG  
GCAACCCCTATGCGGTGATCCATCGCGCTGATATCCACGTGTCGATCCTGGAGGCGGTGCAG  
GACCATCCGCTGATCACTTTTCGCACGAGCACGCGCGTGGAGCGGTTACTGCAGGACGACAA  
GGGTGTGACCGTGATCGACCAGCACGGCGAGCATACCATGGCGACGCGGTGATCGGCTGCC  
ACGGCGTCAAGTCCGCCATCCGCCAGGCATTGATCGGCGATGAGCCCCGCTACCGGCCAT  
GTGGTCTACCGCGCCGTGGTCGACGTCGCCGACATGCCGACGACCTGCAGGTCAATGCACC  
GGTGGTGTGGGCCGGCCCGCACTGCCACCTGGTCCACTACCCGCTGCGCGGCGGCCAGCAGT  
ACAACCTGGTGGTGACCTTCCACAGCCGCGAGCAGGAAACCTGGGGCGTGGCGGACGGCAGC  
AAGGCGGAAGTGCTGTGCTACTTCGAAGGCATCCATCCGCTGCCACACCAGATGCTGGACCG  
GCCACTTCCTGGAAGCGCTGGGCCACCGCCGACCGCGACCCGGTCGAGCGCTGGAGCTTCG  
GCCGCGCCACCATCCTGGGCGATGCCGCACACCCGATGACCCAATACGTGGCCCAGGGCGCC  
TGCCAGGCGCTGGAAGACGCAGTCACGCTGGGCGCCGCGGTGCAGGCCGCCGGCGGCGACT  
ACGAGGCAGCATTCAAGCTGTACGAGCAGGCCCGCATCCCGCTACCGCGCGCGTGTGTAC  
GCCGCGCGGACATGGGCGCGCTTACCACGCCAAGGGTGTGGACCGCCTGGTGCGAACAG  
CCTGTGGACTGGCCGCACGCAGGCGCAGTTCTACGACGCGCTGCAGTGGCTGCATGGCTGGC  
GTGCCGACCAGTGCCCTGAGCCCCACGCCGTGGCTGTAA

*phgC*

ATGGTAGCAAGTCAACAGCAACCCGGATTACATACTAACTTGTCTGATACTCAACTTCTAAAAC  
TCAACCAAATGCTTGTATTTGTTTCTCAAATAATGAGTTTATAGAGAAAAGCTAAATAATAT  
ATCTTTCCGATAACATTCTACTAAAGATTTGCAAGAGCTACCGTTTACTACAAAAGCCGAATTG  
GTGGAAGATCAAAAGAAATTTGCTCCTCATGGAAAAACCATACTTCTACTAAATCAGAATATG  
TTCGGTATCATCAGACTTCTGGAACAACAGGAAGGCCATTGAAAATTATGGATACGAAGGAAA  
GCTGGAGTTGGTGGGAGGATTGTTGGCTTGAAGTATTTCCGGTCCAGTGGTGTACAAAAGAAG  
ATACTGTTTACTTAGCCTTCTCATTTGGACCTTTTATCGGTTTCTGGGGTGCTTTTGAAGCAGC  
AAAAAATTAGGGGCATTAGTTATTACAGGAGGAAGCCAGACTTCTAAGGAAAGGCTGAATAG

TTCATTGATAATGACGCCACCGTCTTCTCGGCACCCCAAGCTATGCGTTACACCTTGGAGA  
AGTAGCGAAACAAAATAATATCGACTTACGTGAAACGGGAGTCAAAAAAATCATTACTGCAGG  
TGAACCAGGCGGATCTGTTCCCTCTATTAGAAATCAAATTGAAACCATTGGGGAGCTACTCT  
TTTTGACCATGTAGGCATGACTGAAATGGGTGCCTACGGGTATTCTGCTCGGAGCATAATGG  
ACTTCATATCAATGAATCAGAATTCATTGCGGAGGTAGTTAATCCAGACACTCTTAAATCTGTA  
GAAATTGGTGAACGCGGGGAATTGGTACTAACAACCTTAGGTCGTTATGGATATCCACTTATT  
CGCTATAGGACTGGAGATATTGTAATTCACTCTAGTGAATCCTGTCCTGCGGAAATACTTATA  
AACTTCTTCAAAGGGGATTATCGGCCGCAAAGATGACATGGTCGTCATTGCGGAATCAATA  
TTTACCCCTTCTCCATTGAAGCCATTGTACGTGAATTTTCAGCAATAACGGAATACCGCATTAT  
ATATTATACAAAAGGCGGCATGGATCAAATCAAGCTGCAAATTGAAACAAATGTAGATATCTC  
CTCCATTGTAGCCACACATTTAAGAGATCGTGTCCGGTTAAGAATTGATGTAGAGGTCGTAGA  
AACCAACATCTTCCACGTTTCGATATGAAGGCAAGGCGTGTGGACAAAAGAGACGCCTT  
CTAA

*phgB*

ATGGGTGCAGTTACTTATGATTTTCAAGTGAATGGGGAGATACGGATGCAGCAGGAATCGTA  
TATTACCGAATTTTATAGCTGGATGGATGAAGCTACGCATCATTTTTTCAAAACACTTGGCC  
ATCCTACATCTAAATTATTACAGAGAATCGAATAGGGGTTCTTTACTTGAAGCACATTGCAG  
CTTTAGAATCCCTTATTTTCATGAAGATGATGTCCAGATTCAAACAGAAGCGATAGAAATCCGT  
GATAAGGTTTTTAAGCTGATCCATACTTTTATGAGAGATAATGACGTCATCGCGGAAGGATAT  
GAGCTACGCGCTATGCATCTGTAGCAGATCATAAACCAAAGGCGCAGTCCATTCCAGAGGAA  
TTGAAATCGAAAATGGAAATAGGCGCATAA

*phgA*

ATGCAAACGAATCAAACGGATCATTTATGCCGTCAGAGCATAGTTATTGGGGCTGGCCCTGTT  
GGCTTAACAGCTGCGTTGGCATTGAAAAACCTAGGACTGGAAGTAGCAGTTTTAGAAGGAGAG  
CCTAAGGATAGACAAAAGACCAGGAAGTCGTGCCATTTATCTACATAAAGCCACACTCGGCCTT  
ATAGATGAAATTTCTCCGGGACTTGGATATAAACTTGCTGAAAATGGAGTGGTTTGGCCTGTT  
AAAAGAACGTTATTCCGTGGGAAAGAAGTGTATGTACGTAACACTACGGTGCACAAAAACGGAA  
GGATTACCTCCTTTTACAAGCTTACCTCAAGTAGAGGCAGAAAAATATCTTTATGAAGCTTGTA  
TTAAAGCGGCATAGAATTCTTCTACGATAAGCCGTAACCTGACGTTAAGACTAGTAAAAATG  
GGGTGGAAGTGTATATTGGATCTGATGAAGTTTGGAAAGCGGACTACATCATAGCGGCTGATG  
GCGGGCGATCAGCTGTACGCCAGGCTATAGGTGTAGAGCTTGAAGTCCCTCGAACGAAAGAT  
ACCTTCTTAGTGGTTGATGTGATTGAAGATAAAGAAAATCCGCTTCCCCTTGAAGGATCTTTC  
ATTACCAACACCCGGAATGGGCGGAAGAAATGTTATGTATGTTCCATTTAAAGGTGGCTGGC  
GCGTAGATTTGCAACTACTAGATGGTGATGATCCTGATGAGTTCAGCGGAAAGGAAGGCGTCC  
AAAATTGGCTCCCTAAAGTCATGGATGCAAATACGCAGATGCTATTACATGGGTTTCCACAT



ATACATTCCACCAAGCGGTTTCAAGTTCTTATACTGATGAAAACAATCGTGTACTTCTTGCTGG  
AGAAGCAGCGCATTATTTCGCTCCATTGGTGCTCGGGGTTTGAATTCAGGTGTACCCGATGC  
AATCATTGCGGCCAGGGGAATTAGAAAAGCCGTGGACTCAGGTAATTTAGAAGAAGCGAAAC  
AAGCGATTGCTGATGGAGCAAATGAACGCAGAATAGCAGGTTTATACAATCGCGAAGGCTCTA  
ATACGGCCCTTCATCATATTCAAGGATCATCTTCTTATATGAACAGAAAAAAGAGGTGGCTG  
CTTCACTTTCAACCATTGTTCCGTCGATTGGACGCTGGCTTGATGAAGGTCCATATGGTCCGA  
GATCTGGTCCGCCGAATTGACAACAAAATACTAA

*hyg5*

ATGAACCCGTCCTCGTTGGTTCTTAACGGACTGACAAGCTATTTGAGAATGGCCGCGCCCGC  
GTAGTACCCCCGTGGGACGTAACATCCTGGGTGTGGTGAATTATGCCTCTGTTTGCGAATAC  
CCAACACTGGATCACGGATACCCAGAGTTAGAGATTAACATGGTTGCCCGACAGCGGAGCCA  
TTCGCAGAGGTATGGGTTACCGATGCTGAGTCCGAACATGGTGAGCGTGACGGAATCACATAT  
GCTCACGACGGGGAGTACTTTTTTGTGCAGGCCGCGTGCCCCCTACGGGTCGTTATACTGAA  
GCTACTCGTGTGCGTACGTTACGATGTTGAACTGCTGGAGGAGTTTGGGTATTCTAGCGTG  
TTTCGCATGTGGAACTTTATCGGTGATATTAATCGCGATAACCGGGAGGGGATGGAAGTCTAC  
CGCGATTTCTGCCGTGGTCCGCCGAGGCGTTTGAACAGTGCCGCTGGAGTTCGATCAATTT  
CCTGCCGCCACAGGCATCGGATCACGTGGAGGAGGTATTGCCTTCTACCTTTTAGCGTGCCGC  
AGTGGGGGTCACGTACACATCGAGAACCCGCGCCAAGTCCCAGCGTACCATTACCCCAAGCG  
TTACGGACCCCGCGCTCCGCGTTTTGCTCGCGCGACATATCTTCTTCGCGCGCGGCTGATGG  
AGTAGGTGGTCAAGTCTTCGTCTCGGAACTGCCTCAGTGCTTGCCATGAGACAGCACACGA  
AGGCGACCTTGTAACAATGTGCCTGGCACTGGAGAACATCGAATTAGTTATTTCCGGGCGG  
CAACTTGGCTGCCATGGCATTTCGCCCGTTCATGGTTTAACTGCTTTGCGTAACATTAAGGT  
ATATGTGCGCCGTTCTGAAGACGTACCTGCAGTTCGTGAAATCTGTCGCGAGGCCTTCTCTCC  
AGACCGGGACATTGTATATTTAACAGTAGACGTGTCACGCTCTGACTTACTTGTGAGATTGA  
GGGCGTCGTCATGTAA

*hyg5\**

ATGAACCCGTCCAAGCCTGGTCTGAATGGGCTGACGTCGTACTTTGAGAACGGTCGTGCTAGG  
GTAGTGCCCCGGTTGGCAGAAACATTCTGGGCGTGGTGAATTACGCGTCCGTTTGCGAATAT  
CCGACCCCTGGACCATGGGTATCCGGAACTCGAAATCAACATGGTCGCGCTACCGCAGAACCC  
TTCGCAGAAGTGTGGGTGACAGATGCCGAGAGTGAACACGGTGAACGCGATGGGATTACGTA  
TGCCCATGATGGCGAGTACTTCTTTTGCGCGGGACGTGTTCCGCCCACTGGCCGCTATACCGA  
AGCCACACGCGCAGCGTACGTAACGATGTTTGAACCTCCTGGAAGAGTTTGGCTATAGCAGTGT  
GTTTCGGATGTGGAACCTTCAATGGCGACATCAATCGCGATAATGCCGAAGGGATGGAAGTGT  
TCGCGACTTTTGCCGCGGACGTGCGGAAGCGTTTGAACAGTGTGCGCTGGAGTTCGACCAGTT  
TCCGGCTGCAACCGGGATTGGTTCTCGTGGCGGTGGTATCCGCGTTTTATCTGCTGGCCGTGTCG

TTCGGGTGGGCACGTCCATATCGAGAATCCGCGTCAAGTCCCAGCGTATCACTATCCGAAACG  
 CTATGGTCCTCGTGCTCCCCGCTTTGCCCGTGCACCTACTTGCCGAGTCGTGCGGCTGATGG  
 CGTAGGAGGCCAAGTGTTCGTATCAGGCACCGCATCAGTACTGGGACACGAACTGCCCATG  
 AAGGTGATCTGGTTAAACAGTGTGCAATTAGCCCTTGAGAACATTGAGTTGGTCATTAGTGGCG  
 GGAATTTAGCGGCTCATGGCATAAGCGCTGGTCATGGCCTCACGGCATTACGCAACATCAAGG  
 TTTACGTTTCGTGCTCCGAGGATGTGCCTGCAGTTCGGGAAATTTGTGCGGAAGCGTTCTCGC  
 CAGATGCCGACATTGTGTACCTTACCGTTGACGTCTGCCGTAGCGATCTCTTGGTGGAAATCG  
 AAGGTGTCGTGATGTAA

*ubic*

ATGTCACACCCCGCGTTAACGCAACTGCGTGCGCTGCGCTATTGTAAAGAGATCCCTGCCCTG  
 GATCCGCAACTGCTCGACTGGCTGTTGCTGGAGGATTCCATGACAAAACGTTTTGAACAGCAG  
 GGAAAAACGGTAAGCGTGACGATGATCCGCGAAGGGTTTGTGCGAGCAGAATGAAATCCCCGA  
 AGAACTGCCGCTGCTGCCGAAAGAGTCTCGTTACTGGTTACGTGAAATTTGTTATGTGCCGA  
 TGGTGAACCGTGGCTTGCCGGTTCGACCGTTCCTGTGTCAACGTTAAGCGGGCCGGAGCT  
 GCGGTTACAAAAATTGGGTAAAACGCCGTTAGGACGCTATCTGTTACATCATCGACATTAAC  
 CCGGGACTTTATTGAGATAGGCCGTGATGCCGGGCTGTGGGGGCGACGTTCCCGCTGCGAT  
 TAAGCGGTAAACCGCTGTTGCTAACAGAAGTGTTTTACCGGCGTCACCGTTGTACTAA

**Table S3 Key Primer sequences used in this study**

| <b>Primer</b>     | <b>sequence</b>                                | <b>use</b>                                    |
|-------------------|------------------------------------------------|-----------------------------------------------|
| KpnI-3HB6H-F      | GGAAGgtaccATGTGCAACCTGCAGGACGCACG              | to amplify 3hb6h gene for pHA-3HB6H           |
| HindIII-3HB6H-R   | GGAAaagcttTTACGAAGCGCGTCCGAACTATATC            |                                               |
| KpnI-Re3HB6H-F    | GGAAGgtaccatgagcagtaccaacaacgcg                | to amplify Re3hb6h gene for pHA-Re3HB6H       |
| HindIII-Re3HB6H-R | GGAAaagcttttacagccacggcgtggggctc               |                                               |
| KpnI-PhgA-F       | TGTACAttagaaggctctctttgtccaaaac                | to amplify phgA gene for pHA-phgA             |
| Sall-PhgA-R       | GGAAgtcgacttagtattttgttcaattccggcgaccaga       |                                               |
| KpnI-PhgB-F       | GGAAAggtaccatgggtgcagttactatgatatt             | to amplify phgB gene for pHA-phgB             |
| XbaI-PhgB-R       | GGAActtagagtcattattatgcgcctatttccatttgcatttcaa |                                               |
| KpnI-PhgC-F       | GGAAAggtaccatggtgcaagtgcaacgcaaccggatta        | to amplify phgC gene for pHA-phgC             |
| BsrGI-PhgC-R      | ggaaTGTACAttagaaggcgtctctttgtccaaaac           |                                               |
| XhoI-PLlacO1-F    | GGAAActcgagaattgtgagcggataacaattgacatt         | to amplify phgB operon for pHA-phgC-phgB      |
| BsrGI-ter-R       | ggaaTGTACAtactcaggagagcgtcaccgacaacaacaga      |                                               |
| XbaI-PLlacO1-F    | ggaaTCTAGAAaattgtgagcggataacaattgacattgtgagc   | to amplify phgA operon for pHA-phgC-phgB-phgA |
| SacI-Ter-R        | gggaaaGAGCTCaggagagcgttcaccgacaa               |                                               |
| KpnI-hyg5-F       | GGAAAggtaccATGAACCCGTCCTCGTTGGTTC              | to amplify hyg5 gene for pHA-Hyg5             |
| Sall-hyg5-R       | GGAAgtcgacTTACATGACGACGCCCTCAATCTC             |                                               |

|                 |                                                  |                                                                                                                                                                 |
|-----------------|--------------------------------------------------|-----------------------------------------------------------------------------------------------------------------------------------------------------------------|
| KpnI-Hyg5*-F    | GGAAggtaccATGAACCCGCTAGCCTGGTC                   | to amplify hyg5* gene for pHA-Hyg5*                                                                                                                             |
| Sall-Hyg5*-R    | GGAAgtcgacTTACATCACGACACCTTCGATTTCCA             |                                                                                                                                                                 |
| KpnI-ubiC-F     | GGAAggtaccatgTCACACCCCGGTTAACG                   | to amplify ubic gene for pHA-ubic                                                                                                                               |
| Sall-ubiC-R     | GGAAgtcgacttaGTACAACGGTGACGCCGG                  |                                                                                                                                                                 |
| SpeI-PLlacO1-F  | GGAAactagtaattgtgagcggataacaattg                 | to amplify 3hb6h operon for pHA-Hyg5-3HB6H and pHA-Hyg5*-3HB6H; to amplify ubic operon for pCS-PS-ubic; to amplify salABCD operon for pCS-Plpp0.2-tetR- SalABCD |
| SacI-Ter-R      | gggaaaGAGCTCaggagagcgttcaccgacaa                 |                                                                                                                                                                 |
| XhoI-PLlacO1-F  | GGAActcgagaattgtgagcggataacaattgacatt            | to amplify phgA operon for pHA-phgC-phgA                                                                                                                        |
| BsrGI-ter-R     | ggaaTGTAACtactcaggagagcgttcaccgacaacaacaga       |                                                                                                                                                                 |
| SacI-XbaI-pHA-F | GGAAgagctcctaTCTAGAgctctgacagttaccaatgcttaacagtg | introduce XbaI site to pHA-phgC-phgA                                                                                                                            |
| ScaI-pHA-R      | GGAAagtaactcaccagtcacagaaaagc                    |                                                                                                                                                                 |
| SacI-PLlacO1-F  | GGAAgagctcaattgtgagcggataacaattgac               | to amplify pqsD operon for pHA-phgC-phgA-pqsD                                                                                                                   |
| XbaI-Ter-R      | ggaaTCTAGAcaggagagcgttcaccgacaacaac              |                                                                                                                                                                 |
| ptetO1-SpeI-F   | gggaaaACTAGTTCCTATCAGTGATAGAGATTGACA             | to amplify Pteto1-PS operon for pZE-EP-Pteto1-pqsD-sdgA                                                                                                         |
| SacI-Ter-R      | gggaaaGAGCTCaggagagcgttcaccgacaa                 |                                                                                                                                                                 |
| tetR-KpnI-F     | gggaaaGGTACCATTTCATTTTCAGATCCTGTGTAA             | to amplify tetR gene for pCS-lpp0.2-tetR                                                                                                                        |
| tetR-BamHI-R    | gggaaaGGATCCttaagaccactttcacatttaag              |                                                                                                                                                                 |
| P259A FL        | tgccatcaaGcgaacctgcgcatcctcgatcggtgcagga         | to get pET-PqsD (P259A) and pZE-EP-Pteto1-PqsD (P259A)-SdgA based on pET-PqsD and pZE-EP-Pteto1-PqsD-SdgA                                                       |
| P259A FS        | cgcatcctcgatcggtgcagga                           |                                                                                                                                                                 |
| P259A RL        | caggttcgCttgatggcagatcacatggtcgatgctgt           |                                                                                                                                                                 |
| P259A RS        | gatcacatggtcgatgctgt                             |                                                                                                                                                                 |
| P259G FL        | tgccatcaaGGCaacctgcgcatcctcgatcggtgcagga         | to get pqsD mutant                                                                                                                                              |
| P259G FS        | caggttGCCttgatggcagatcacatggtcgatgctgt           |                                                                                                                                                                 |
| Q258A FL        | tgccatGCaccgaacctgcgcatcctcgatcggtgcagga         |                                                                                                                                                                 |
| Q258A RL        | caggttcggtGCatggcagatcacatggtcgatgctgt           |                                                                                                                                                                 |
| Q258G FL        | tgccatggaccgaacctgcgcatcctcgatcggtgcagga         |                                                                                                                                                                 |
| Q258G RL        | caggttcggtCCatggcagatcacatggtcgatgctgt           |                                                                                                                                                                 |
| Y315A FL        | ctggtctgaccGCCggtccgcgcgacctggggcgcg             |                                                                                                                                                                 |
| Y315A FS        | ggcgcgacctggggcgcg                               |                                                                                                                                                                 |
| Y315A RL        | ggagccGGCggtcaggaccagcaccctgtcccggctgga          |                                                                                                                                                                 |
| Y315A RS        | caccctgtcccggctgga                               |                                                                                                                                                                 |
| T314S FL        | ctggtctgAGCtacggtccggcgacctggggcgcg              |                                                                                                                                                                 |
| T314S RL        | ggagccgtagctcaggaccagcaccctgtcccggct             |                                                                                                                                                                 |
| Q258K FL        | tgccatAAGccgaacctgcgcatcctcgatcggtgcagga         |                                                                                                                                                                 |
| Q258K RL        | caggttcggCTTatggcagatcacatggtcgatgctgt           |                                                                                                                                                                 |
| Q258E FL        | tgccatGAGccgaacctgcgcatcctcgatcggtgcagga         |                                                                                                                                                                 |
| Q258E RL        | caggttcggCTCatggcagatcacatggtcgatgctgt           |                                                                                                                                                                 |
| P259T FL        | tgccatcaaACCaacctgcgcatcctcgatcggtgcagga         |                                                                                                                                                                 |

|                   |                                             |                                         |
|-------------------|---------------------------------------------|-----------------------------------------|
| P259T RL          | caggttGGTttgatggcagatcacatggtcgtatgctg      |                                         |
| P259L FL          | tgccatcaaCTGaacctgcgcatcctcgtatgctggtgcagga |                                         |
| P259L RL          | caggttCAGttgatggcagatcacatggtcgtatgctg      |                                         |
| T314A FL          | ctggtcctgGCAtacggctccggcgacctggggcgcg       |                                         |
| T314A RL          | ggagccgtatgccagaccagcaccctgtcccggct         |                                         |
| S292A FL          | atggcttcggccgccaccccggtcacgctggcgatgtct     |                                         |
| S292A FS          | gtcacgctggcgatgtctg                         |                                         |
| S292A RL          | cggggtggcgccgaagccatgttcccagacgatcca        |                                         |
| S292A RS          | gttcccagacgatccacggtca                      |                                         |
| S292Q FL          | atggcttcggccagaccccggtcacgctggcgatgtct      |                                         |
| S292Q RL          | cggggtctggcgccgaagccatgttcccagacgatcca      |                                         |
| S292T FL          | atggcttcggccaccaccccggtcacgctggcgatgtct     |                                         |
| S292T RL          | cggggtggtggcgccgaagccatgttcccagacgatcca     |                                         |
| BamHI-hyg5-F      | GGAAAggatccGATGAACCCGTCCTCGTTGGTTTC         | to amplify hyg5 gene for pET-Hyg5       |
| HindIII-hyg5-R    | GGAAaagcttTTACATGACGACGCCCTCAATC            |                                         |
| BamHI-3HB6H-F     | GGAAAggatccGATGTGCAACCTGCAGGACGC            | to amplify 3hb6h gene for pET-3HB6H     |
| HindIII-3HB6H-R   | GGAAaagcttTTACGAAGCGCGGTCCGAACATATC         |                                         |
| BamHI-Ru3HB6H     | GGAAAggatccGatgagcagtagcaacaacgc            | to amplify Re3hb6h gene for pET-Re3HB6H |
| HindIII-Re3HB6H-R | GGAAaagcttttacagccagcgctggggctc             |                                         |
| BamHI-sdgA-His-F  | gggaaaGGATCCGacgcgtgaggattcgtgcctc          | to amplify sdgA gene for pET-SdgA       |
| PstI-sdgA-R       | gggaaactcagtcacaccgctcagcggagtct            |                                         |
| BamHI-pqsD-F      | GGAAAggatccGatgggtaatccgactcctg             | to amplify pqsD gene for pET-PqsD       |
| HindIII-pqsD-R    | GGAAaagctttcaacatggccggttcacctc             |                                         |

## Supplementary Results

### Enzyme Engineering to Increase the Pathway Efficiency

#### pqsD engineering

To address by-product formation in the route I, the PqsD enzyme was rationally engineered to improve its substrate selectivity and activity for 2,5-DHBA-CoA. The feeding experiment indicated that PqsD showed relatively low efficiencies in converting 2,5-DHBA-CoA to 4,6-DHC, which was a limiting step for 4,6-DHC generation (**Fig. 3a**). Kinetic studies revealed PqsD displayed a greater substrate preference for 2-HBA-CoA ( $K_{cat} = 103.56 \pm 2.72 \text{ min}^{-1}$ ,  $K_m = 27.2 \pm 3.4 \text{ }\mu\text{M}$ ) over 2,5-DHBA-CoA ( $K_{cat} = 63.28 \pm 4.17 \text{ min}^{-1}$ ,  $K_m = 97.3 \pm 16.7 \text{ }\mu\text{M}$ ) (**Table 1**). Rational protein engineering was applied to enhance PqsD selectivity and catalytic activity towards 2,5-DHBA-CoA to eliminate the byproduct production. Docking simulations were operated through AutoDock Vina<sup>9</sup>. The crystal structure of PqsD from *Pseudomonas aeruginosa* PAO1 (PDB code: 3H76) was selected for our work. The binding mode was found to be like the co-crystal structure of PqsD, which involves the binding of the ligand anthranilate (**Fig. 5a**)<sup>10</sup>. Due to the larger size of 2,5-DHBA-CoA compared to initial substrates such as anthranilate-CoA and 2-HBA-CoA, replacing residues in the active site with smaller residues will enlarge the pocket's cavity volume, potentially enhancing the interaction between the active site and 2,5-DHBA-CoA. To verify this hypothesis, residues at positions 258, 259, 292, 314 and 315 of PqsD, situated within the catalytic pocket, were selected as potential sites for optimization. Firstly, variants Q258A/G, P259A/G, S292A, T314A, Y315A were designed with the rationale to reduce the size of these locations by introducing small residues. The feeding experiment showed that only the P259A mutant produced increased titer of 4,6-DHC compared to the wild-type PqsD (1.45-fold,  $38.4 \pm 1.8 \text{ mg/L}$  vs  $26.3 \pm 1.9 \text{ mg/L}$ ) (**Fig. 5b**). In addition to this, we postulated that hydrophobic interactions within the active pocket could play a significant role in maintaining enzyme activity. Therefore, we muted the P259 into leucine. Additionally, we assumed optimizing residues within the binding pocket, such as introducing some polar residues may enhance the possibility to form

hydrogen bond between 2,5-DHBA-CoA and the receptor, thereby improving its catalytic activity. So, the following 6 single mutations were constructed: Q258K, Q258E, P259T, T314S, S292T and S292Q. The feeding assays were also carried out to test these mutants' activity. Based on the current result, we further added three combinational mutants (P259A/T314S, P259A/S292A, P259A/S292T) to potentially yield better variants. Additionally, we conducted random mutation on P259 of PqsD to further enhance catalytic activity and 25 single colonies were selected and tested, though no better variants were selected (**Fig. 5b, Supplementary Fig. 6**). Kinetic studies with PqsD-P259A ( $K_{cat} = 140.92 \pm 10.16 \text{ min}^{-1}$ ,  $K_m = 58.8 \pm 8.1 \text{ }\mu\text{M}$ ) (**Table 1, Supplementary Fig. 7**) showed an increase in  $K_{cat}$  and a decrease in  $K_m$  toward 2,5-DHBA-CoA compared to wild-type PqsD ( $K_{cat} = 63.28 \pm 4.17 \text{ min}^{-1}$ ,  $K_m = 97.3 \pm 16.7 \text{ }\mu\text{M}$ ). The combination of increased  $K_{cat}$  and  $K_m$  signifies PqsD-P259A mutation improves both the binding affinity and the catalytic activity of the enzyme toward 2,5-DHBA-CoA.

## Supplementary References

- 1 Atsumi, S. *et al.* Metabolic engineering of *Escherichia coli* for 1-butanol production. *Metab Eng* **10**, 305-311, doi:10.1016/j.ymben.2007.08.003 (2008).
- 2 Huang, Q., Lin, Y. & Yan, Y. Caffeic acid production enhancement by engineering a phenylalanine over-producing *Escherichia coli* strain. *Biotechnol Bioeng* **110**, 3188-3196, doi:10.1002/bit.24988 (2013).
- 3 Lutz, R. & Bujard, H. Independent and tight regulation of transcriptional units in *Escherichia coli* via the LacR/O, the TetR/O and AraC/I1-I2 regulatory elements. *Nucleic Acids Res* **25**, 1203-1210, doi:10.1093/nar/25.6.1203 (1997).
- 4 Shen, C. R. & Liao, J. C. Metabolic engineering of *Escherichia coli* for 1-butanol and 1-propanol production via the keto-acid pathways. *Metab Eng* **10**, 312-320, doi:10.1016/j.ymben.2008.08.001 (2008).
- 5 Jiang, T. *et al.* Establishing Tunable Genetic Logic Gates with Versatile Dynamic Performance by Varying Regulatory Parameters. *ACS Synth Biol* **12**, 3730-3742, doi:10.1021/acssynbio.3c00554 (2023).
- 6 Jiang, T. *et al.* Establishing an Autonomous Cascaded Artificial Dynamic (AutoCAD) regulation system for improved pathway performance. *Metab Eng* **74**, 1-10, doi:10.1016/j.ymben.2022.08.009 (2022).
- 7 Lin, Y., Shen, X., Yuan, Q. & Yan, Y. Microbial biosynthesis of the anticoagulant precursor 4-hydroxycoumarin. *Nat Commun* **4**, 2603, doi:10.1038/ncomms3603 (2013).
- 8 Shen, X. *et al.* Establishment of Novel Biosynthetic Pathways for the Production of Salicyl Alcohol and Gentsyl Alcohol in Engineered *Escherichia coli*. *ACS Synth Biol* **7**, 1012-1017, doi:10.1021/acssynbio.8b00051 (2018).
- 9 Trott, O. & Olson, A. J. AutoDock Vina: improving the speed and accuracy of docking with a new scoring function, efficient optimization, and multithreading. *J Comput Chem* **31**, 455-461, doi:10.1002/jcc.21334 (2010).
- 10 Bera, A. K. *et al.* Structure of PqsD, a *Pseudomonas* quinolone signal biosynthetic enzyme, in complex with anthranilate. *Biochemistry* **48**, 8644-8655, doi:10.1021/bi9009055 (2009).
